# Supplementary material for: Online Physical Exercise and Group Sessions to Increase and Maintain Physical Activity in Individuals with Type 2 Diabetes: A Single-Arm Feasibility Study
Source: MDPI journal article supplement (doi:10.3390/ijerph20042893), 2023-02-07
Supplement: s1 [file s1]

### Supplement 3. Description of content in the interval circuit physical exercise program

X<sub>1</sub>, intended intensity (Borg scale)

X<sub>2</sub>, number of repetitions

X<sub>3</sub>, number of sets

X<sub>4</sub>, number of exercises (minus warm up and cool down)

X<sub>5</sub>, duration of each exercise (seconds)

X<sub>6</sub>, rest in-between exercises (seconds)

X<sub>7</sub>, rest in-between sets (minutes)

X<sub>8</sub>, sessions per week

| X <sub>1</sub> | X <sub>2</sub>                  | X <sub>3</sub> | X <sub>4</sub> | X <sub>5</sub> | X <sub>6</sub> | X <sub>7</sub> | X <sub>8</sub> |
|----------------|---------------------------------|----------------|----------------|----------------|----------------|----------------|----------------|
| 16             | As many repetitions as possible | 2              | 8              | 40             | 20             | 2              | 1              |

| Exercise type                     | Specific exercises                               | Progression                                                                                                               | Regression                                   | Illustration                                                                          |
|-----------------------------------|--------------------------------------------------|---------------------------------------------------------------------------------------------------------------------------|----------------------------------------------|---------------------------------------------------------------------------------------|
| <b>Warm up</b>                    | Different movements and slightly increasing pace |                                                                                                                           |                                              |                                                                                       |
| <b>Strength exercises (Set 1)</b> | Repeated sit-to-stand from a chair               | - No support from armrests<br>- No use of chair (squats)                                                                  | - Use support from armrests                  |  |
|                                   | Diagonally raises with support from a chair      | - No support from chair<br>- Move opposite elbow to knee in one movement following the diagonally raises                  | - Raise knees supporting both hands to chair |  |
|                                   | Press ups at a wall                              | - Increase distance from feet to wall                                                                                     | - Decrease distance from feet to wall        |  |
|                                   | Side flexion (sitting position)                  | - Raise arms<br>- Standing with wide distance between feet with knees slightly flexed – do side flexions with raised arms | - Decrease side flexion                      |  |
| <b>Aerobic exercises (Set 2)</b>  | Knee raises (standing position)                  | - Increase pace                                                                                                           | - Support from a chair or wall               |  |

|                                     |                                 |                                                                                                                                                                   |                                                                                                                                                                         |                                                                                      |
|-------------------------------------|---------------------------------|-------------------------------------------------------------------------------------------------------------------------------------------------------------------|-------------------------------------------------------------------------------------------------------------------------------------------------------------------------|--------------------------------------------------------------------------------------|
|                                     | Air-boxing                      | <ul style="list-style-type: none"> <li>- Increase pace</li> <li>- Do small footsteps while boxing</li> </ul>                                                      | - Decrease pace                                                                                                                                                         |   |
|                                     | “Twist”                         | <ul style="list-style-type: none"> <li>- Increase pace</li> </ul>                                                                                                 | - Decrease pace                                                                                                                                                         |   |
|                                     | Step sideways                   | <ul style="list-style-type: none"> <li>- Increase pace</li> <li>- Include arms</li> </ul>                                                                         | <ul style="list-style-type: none"> <li>- Decrease pace</li> <li>- Support from a chair or wall</li> </ul>                                                               |   |
| <b>Balance /cool down exercises</b> | One-leg standing                | <ul style="list-style-type: none"> <li>- Look in different directions</li> <li>- Do smaller movements with arms</li> <li>- Close eyes in small periods</li> </ul> | <ul style="list-style-type: none"> <li>- Support from a chair or wall</li> <li>- Stand on both legs; look in different directions, do smaller movements etc.</li> </ul> |   |
|                                     | Toe-stand                       | <ul style="list-style-type: none"> <li>- Stand on one leg</li> </ul>                                                                                              | - Support from a chair or wall                                                                                                                                          |  |
| <b>Stretch out</b>                  | Stretch out major muscle groups |                                                                                                                                                                   |                                                                                                                                                                         |                                                                                      |
