# Supplementary material for: Online Physical Exercise and Group Sessions to Increase and Maintain Physical Activity in Individuals with Type 2 Diabetes: A Single-Arm Feasibility Study
Source: MDPI journal article supplement (doi:10.3390/ijerph20042893), 2023-02-07
Supplement: s1 [file s1]

## Supplement 4. Participant feedback

| Statements                                                                                          | <i>n</i> , % that responded “Highly agree” or “Agree” |
|-----------------------------------------------------------------------------------------------------|-------------------------------------------------------|
| <i>General satisfaction with the project</i>                                                        |                                                       |
| The project met my expectations                                                                     | 17 (89.5)                                             |
| I will recommend the project to others                                                              | 19 (100.0)                                            |
| I participated in the project because I wanted to                                                   | 19 (100.0)                                            |
| Information about the content of the project was appropriate                                        | 18 (94.7)                                             |
| <i>Participation and communication</i>                                                              |                                                       |
| The communication from the project coordinator was understandable                                   | 19 (100.0)                                            |
| The project coordinator was reachable during the project                                            | 18 (94.7)                                             |
| The number of emails, calls and text messages was adequate                                          | 18 (94.7)                                             |
| <i>Online physical exercise</i>                                                                     |                                                       |
| The online physical exercise met my expectations                                                    | 18 (94.7)                                             |
| I felt safe turning the video camera on during the online physical exercises                        | 18 (94.7)                                             |
| The introduction to Borg-scale was appropriate                                                      | 17 (89.5)                                             |
| The level of the physical exercises was adjusted to my level                                        | 15 (79.0)                                             |
| It was motivating to do physical exercises with others even though it was behind a screen           | 16 (84.2)                                             |
| I will recommend the online physical exercise to others                                             | 19 (100.0)                                            |
| <i>Online group meetings</i>                                                                        |                                                       |
| I felt comfortable turning the video camera on during online group meetings                         | 19 (100.0)                                            |
| The group supported me to be active in every life                                                   | 13 (68.4)                                             |
| Being a part of a smaller online group motivated me to participate in the online physical exercises | 13 (68.4)                                             |
| I felt we had a sense of solidarity in the smaller online group                                     | 13 (68.4)                                             |
| <i>Activity goals</i>                                                                               |                                                       |
| I was able to set a realistic weekly activity goal                                                  | 18 (94.7)                                             |
| The smaller group supported me to reach my weekly activity goal                                     | 13 (68.4)                                             |
| I had to down prioritize other things to reach my weekly activity goal                              | 5 (26.3)                                              |
| <i>Microsoft Teams</i>                                                                              |                                                       |
| The introduction to Microsoft Teams was sufficient                                                  | 16 (84.2)                                             |
| I felt comfortable using Microsoft Teams                                                            | 18 (94.7)                                             |
| I experienced technical issues with Microsoft Teams                                                 | 7 (36.8)                                              |
| I got the necessary support and help to use Microsoft Teams                                         | 15 (79.0)                                             |
| <i>Garmin watches</i>                                                                               |                                                       |
| The introduction to Garmin watches was sufficient                                                   | 15 (79.0)                                             |
| I got the necessary support and help to use the Garmin watch                                        | 15 (79.0)                                             |
| The Garmin watch's measurement of steps motivated me to be physically active                        | 14 (73.7)                                             |
| The Garmin watch was useful to set weekly activity goals                                            | 14 (73.7)                                             |
| The Garmin watch was useful to reach my weekly activity goal                                        | 13 (68.4)                                             |
| <i>The role of the facilitator in the group meetings (questions only for facilitators)</i>          |                                                       |
| The introduction to the facilitator role was sufficient                                             | 4 (66.7)                                              |
| I used the proposed agenda in the group meetings                                                    | 6 (100.0)                                             |
| It was time and energy consuming to be a facilitator                                                | 1 (16.7)                                              |
| <i>The role of the facilitator in the group meetings (questions only for participants)</i>          |                                                       |
| The facilitator had a structured agenda in the group meetings                                       | 10 (76.9)                                             |
| The facilitator managed to start and direct the group discussions                                   | 10 (76.9)                                             |
| <i>The burden of tasks in the project</i>                                                           |                                                       |
| The number of questionnaires was too much in the beginning of the project                           | 2 (10.5)                                              |
| The number of questionnaires was too much during the project                                        | 3 (15.8)                                              |
| The number of questionnaires was too much in the end of the project                                 | 4 (21.1)                                              |
| The number of smaller tasks e.g., make note of steps and intensity minutes, was appropriate         | 17 (89.5)                                             |
| The introduction to attaching the accelerometers was sufficient                                     | 17 (89.5)                                             |
| Attaching and returning the accelerometers were too time consuming                                  | 2 (10.5)                                              |
| The number of days wearing the accelerometers was appropriate                                       | 13 (68.4)                                             |

*n* = 19

Satisfaction questionnaire from postintervention. Participants responded to what degree they agreed or not with the statements.
