# Supplementary material for: Online Physical Exercise and Group Sessions to Increase and Maintain Physical Activity in Individuals with Type 2 Diabetes: A Single-Arm Feasibility Study
Source: Int J Environ Res Public Health. 2023 Feb 7;20(4):2893. doi: 10.3390/ijerph20042893 (PMC9957045; doi:10.3390/ijerph20042893)
Supplement: Supplementary file 1 [file ijerph-20-02893-s001.zip]

Archive with 4 entries (4 files):
- Table S1_CONSORT checklist feasibility.pdf
- Table S2_TIDieR Telehealth checklist.pdf
- Table S3_Physical exercise program.pdf
- Table S4_Participant feedback.pdf
